# Supplementary material
Source: PubMed Central journal article supplement (PMC5110426)
Supplement: 10-1055-s-0036-1593805_s1600130supl.pdf [file 10-1055-s-0036-1593805_s1600130supl.pdf]

## Search Strategy

### Search

((Robot\*[TI] OR ELECTROMECHANIC\*[TIAB] OR EXOSKELETON\*[TI]) AND (STROKE\*[TI] OR SPINAL CORD[TI]) AND RANDOM\*[TIAB]) OR

("driven-gait orthosis" [TIAB] OR (Lokomat OR Lokomat-Pro)[TIAB] OR WALKBOT[TIAB] OR "stride management assist"[TIAB] OR ERIGO[TIAB] OR AutoAmbulator[TIAB] OR anklebot[tiab] OR "gait trainer"[tiab] OR "MBZ-CPM1" OR "gait assistance robot"[tiab] OR "bionic leg"[tiab])

N = 172

**Table S1** Inclusion and exclusion criteria

| Study component | Inclusion                                                                                                                                                                                                                                                                                                                                                                                                                                                                                                                                                                        | Exclusion                                                                                                                                                                 |
|-----------------|----------------------------------------------------------------------------------------------------------------------------------------------------------------------------------------------------------------------------------------------------------------------------------------------------------------------------------------------------------------------------------------------------------------------------------------------------------------------------------------------------------------------------------------------------------------------------------|---------------------------------------------------------------------------------------------------------------------------------------------------------------------------|
| Population      | <ul style="list-style-type: none"> <li>• Patient with SCI with gait disorder</li> <li>• Age &gt;18, &lt;75 y</li> </ul>                                                                                                                                                                                                                                                                                                                                                                                                                                                          | <ul style="list-style-type: none"> <li>• Neurologic conditions other than SCI or stroke</li> <li>• No neurologic gait disorder</li> <li>• Age &lt;18, &gt;75 y</li> </ul> |
| Intervention    | Assistance or rehabilitation with a wearable exoskeleton of the lower extremity                                                                                                                                                                                                                                                                                                                                                                                                                                                                                                  | Powered gait orthosis<br>Upper extremity                                                                                                                                  |
| Comparators     | Conservative physiotherapy<br>Powered gait orthosis                                                                                                                                                                                                                                                                                                                                                                                                                                                                                                                              |                                                                                                                                                                           |
| Outcomes        | <p>Primary outcomes</p> <ul style="list-style-type: none"> <li>• Gait outcomes (walking speed, 6-min walking test, TUG, 10MWT)</li> <li>• Functional improvement (LEMS, FIM, SCIM, AMI, Fugl-Meyer-L)</li> </ul> <p>Secondary outcomes</p> <ul style="list-style-type: none"> <li>• Neurologic improvement</li> <li>• Motor strength</li> <li>• Bladder and bowel function</li> <li>• Spasticity</li> <li>• Requirement of walking aid</li> </ul> <p>Safety</p> <ul style="list-style-type: none"> <li>• Fracture</li> <li>• Pain</li> <li>• Cardiopulmonary episodes</li> </ul> | Physiologic or metabolic outcomes                                                                                                                                         |
| Study design    | RCTs                                                                                                                                                                                                                                                                                                                                                                                                                                                                                                                                                                             |                                                                                                                                                                           |

Abbreviations: 10MWT, 10-meter walking test; AMI, Ambulatory Motor Index; FIM, Functional Independence Measure ; LEMS, lower extremity motor score; RCT, randomized controlled trial; SCI, spinal cord injury; SCIM, Spinal Cord Independence Measure; TUG, Timed-Up-and-Go.

**Table S2** Summary of main outcome measures

| Outcome measure             | Assessed by        | Components                                                                                                                      | Score range                                  | Interpretation                                                                                  | MCID                                                                              |
|-----------------------------|--------------------|---------------------------------------------------------------------------------------------------------------------------------|----------------------------------------------|-------------------------------------------------------------------------------------------------|-----------------------------------------------------------------------------------|
| 10MWT <sup>1</sup>          | Clinician-reported | Gait speed (m/s) calculated by measuring the total time required to walk 10 m                                                   | 0 to any positive integer                    | Assesses walking speed in meters per second over a short duration (<5 min)                      | SCI: 0.06 m/s                                                                     |
| 6MWT <sup>2</sup>           | Clinician-reported | Total distance (m) walked in 6 min                                                                                              | 0 to any positive integer                    | Assesses distance walked over 6 min as a submaximal test of aerobic capacity/endurance          | SCI<br>Overall MCID: 0.10 m/s<br>Slow speed MCID: 0.11 m/s<br>Fast speed MCID: NR |
| WISCI/WISCI II <sup>3</sup> | Clinician-reported | Amount of assistance:<br><ul style="list-style-type: none"> <li>• Two persons, defined as moderate to maximum assist</li> </ul> | WISCI: 1–20 (best)<br>WISCI II: 0–20 (best)* | Rank orders the ability of a person to walk 10 m after SCI from most to least severe impairment | NR                                                                                |

Table S2 (Continued)

| Outcome measure   | Assessed by                    | Components                                                                                                                                                                                                                                                                                                                                                                                                                                                                                                                                                                                                     | Score range               | Interpretation                                                              | MCID |
|-------------------|--------------------------------|----------------------------------------------------------------------------------------------------------------------------------------------------------------------------------------------------------------------------------------------------------------------------------------------------------------------------------------------------------------------------------------------------------------------------------------------------------------------------------------------------------------------------------------------------------------------------------------------------------------|---------------------------|-----------------------------------------------------------------------------|------|
|                   |                                | <ul style="list-style-type: none"> <li>• One person, defined as minimal assist</li> <li>• No assist</li> <li>• Assistive device (parallel bars, walker, etc.)</li> </ul> Braces: <ul style="list-style-type: none"> <li>• One or two, short or long</li> </ul>                                                                                                                                                                                                                                                                                                                                                 |                           |                                                                             |      |
| FIM-L             | Clinician-reported             | FIM-L subscore is comprised of the two mobility items: <ul style="list-style-type: none"> <li>• Walking/wheel-chair locomotion</li> <li>• Stairs</li> </ul> Each item scored on a scale of 1–7                                                                                                                                                                                                                                                                                                                                                                                                                 | 2–14 (best)               | The higher the score, the better level of function                          | NR   |
| LEMS              | Clinician-reported             | LEMS is a motor subscore of the ASIA impairment scale                                                                                                                                                                                                                                                                                                                                                                                                                                                                                                                                                          | 0–50 (best)               | The higher the score, the greater the motor function in the lower extremity | NR   |
| SCIM <sup>4</sup> | Clinician- or patient-reported | 3 domains <ul style="list-style-type: none"> <li>• Self-care (0–20)               <ul style="list-style-type: none"> <li>◦ Feeding</li> <li>◦ Bathing</li> <li>◦ Dressing</li> <li>◦ Grooming</li> </ul> </li> <li>• Respiration and sphincter management (0–40)               <ul style="list-style-type: none"> <li>◦ Respiration</li> <li>◦ Bladder management</li> <li>◦ Bowel management</li> <li>◦ Use of toilet</li> </ul> </li> <li>• Mobility (0–40)               <ul style="list-style-type: none"> <li>◦ Tasks in the room and toilet</li> <li>◦ Tasks indoors and outdoors</li> </ul> </li> </ul> | 0–100 (best)              | The higher the score, the greater the independence                          | NR   |
| Defecation time   | Clinician-reported             | NR                                                                                                                                                                                                                                                                                                                                                                                                                                                                                                                                                                                                             | 0 to any positive integer | NR                                                                          | NR   |
| Enema volume      | Clinician-reported             | NR                                                                                                                                                                                                                                                                                                                                                                                                                                                                                                                                                                                                             | 0 to any positive integer | NR                                                                          | NR   |

Abbreviations: 6MWT, 6-minute walk test; 10MWT, 10-meter walk test; ASIA, American Spinal Injury Association; FIM-L, Functional Independence Measure–Leg; LEMS, lower extremity motor score; MCID, minimum clinical important difference; N/A, not available; NR, not reported; SCI, spinal cord injury; SCIM, Spinal Cord Independence Measure; WISCI, Walking Index for Spinal Cord Injury I; WISCI II, Walking Index for Spinal Cord Injury II.

**Table S3** Risk of bias and class of evidence for included studies

| First author (year)       | Random sequence generation | Statement of concealment | Intention to treat | Blind assessment | Cointerventions applied equally | Complete F/U of ≥80%                   | <10% difference in F/U between groups                                     | Controlling for confounding | Risk of bias    |
|---------------------------|----------------------------|--------------------------|--------------------|------------------|---------------------------------|----------------------------------------|---------------------------------------------------------------------------|-----------------------------|-----------------|
| Alcobendas-Maestro (2012) | Yes                        | Yes                      | Yes                | Yes              | Yes                             | Yes (93.8%)                            | Yes (92.5% versus 95%)                                                    | Yes                         | Low             |
| Benito-Penalva (2012)     | Unclear <sup>a</sup>       | Unclear                  | Yes                | Unclear          | Yes                             | Yes (80.8%)                            | Yes (84.8% versus 78.6%)                                                  | Yes                         | Moderately high |
| Duffell (2015)            | Unclear                    | Unclear                  | Yes                | Unclear          | Yes                             | Yes (92.77% or 86.7%) <sup>b</sup>     | Yes (96% versus 86% versus 96% or 89% versus 79% versus 93%) <sup>c</sup> | Yes                         | Moderately high |
| Field-Fote (2011)         | Yes                        | Unclear                  | No <sup>d</sup>    | Yes              | Yes                             | Yes (86%)                              | Yes (93% versus 89% versus 82% versus 83%)                                | Yes                         | Moderately high |
| Hornby (2005)             | Unclear                    | Unclear                  | No                 | No               | Yes                             | No (77.4%)                             | Unclear                                                                   | Yes                         | Moderately high |
| Huang (2015)              | Unclear                    | Unclear                  | Unclear            | Unclear          | Yes                             | Unclear                                | Unclear                                                                   | Yes                         | Moderately high |
| Shin (2014)               | Unclear                    | Unclear                  | Yes                | Unclear          | Yes                             | Yes (88%)                              | Yes (90% versus 87%)                                                      | Yes                         | Moderately high |
| Niu (2014)                | Yes                        | Yes                      | Unclear            | No               | Yes                             | Unclear                                | Unclear                                                                   | Yes                         | Moderately high |
| Esclarin-Ruz (2014)       | Yes                        | Yes                      | Yes                | Yes              | Yes                             | Yes (overall: 94%; UMN: 95%, LMN: 93%) | Yes (UMN: 95% versus 95%; LMN: 91% versus 95%)                            | Yes                         | Low             |

<sup>a</sup>“Unclear” indicates no information was provided unless otherwise noted below.

<sup>b</sup>Varies by outcome measure; 10-meter walk test 92.7% (77/83), 6-minute walk test 86.7% (72/83).

<sup>c</sup>Varies by outcome measure; 10-meter walk test (Lokomat versus control versus tizanidine), 96% (26/27) versus 86% (25/29) versus 96% (26/27); 6-minute walk test (Lokomat versus control versus tizanidine), 89% (24/27) versus 79% (23/29) versus 93% (25/27).

<sup>d</sup>Analysis was performed on protocol rather than intention to treat.

**Table S4** Risk of bias for included crossover studies

| First author (year) | Appropriate crossover design | Randomized treatment order | Carryover effect | Unbiased data | Allocation concealment | Blinding | Incomplete outcome data | Selective outcome reporting | Other bias |
|---------------------|------------------------------|----------------------------|------------------|---------------|------------------------|----------|-------------------------|-----------------------------|------------|
| Gorman (2016)       | High                         | Unclear <sup>a</sup>       | Unclear          | Unclear       | Unclear                | Low      | High                    | Low                         | High       |
| Labruyère (2014)    | High                         | Low                        | Low              | Unclear       | Unclear                | Low      | Low                     | Low                         | Low        |

<sup>a</sup>“Unclear” indicates no information was provided unless otherwise noted below.

## Grade and Strength of Evidence

The strength of the overall body of evidence with respect to each primary outcome was determined based on precepts outlined by the Grades of Recommendation Assessment, Development and Evaluation (GRADE) Working Group.<sup>5,6</sup>

The initial strength of the overall body of evidence was considered high if the majority of the studies were randomized controlled trials and low if the majority of the studies were observational studies. Criteria for downgrading published evidence one or two levels included: (1) serious risk of bias, (2) inconsistency of results, (3) indirectness of evidence, (4) imprecision of the effect estimates (e.g., wide confidence intervals), or (5) non-a priori statement of subgroup analyses. Alternatively, the body of evidence could be upgraded one or two levels based on the following factors: (1) large magnitude of effect or (2) dose-response gradient. The final

overall strength of the body of literature expresses our confidence that the effect size lies close to the true effect and the extent to which it is believed to be stable based on the adequacy of or the deficiencies in the body of evidence. An overall strength of high means that we are very confident that the true effect lies close to that of the estimated effect. A moderate rating means that we are moderately confident in the effect estimate; the true effect is likely to be close to the estimated effect, but there is a possibility that it is substantially different. An overall strength of low means that our confidence in the effect estimate is limited; the true effect may be substantially different from the estimate. Finally, a rating of very low means that we have very little confidence in the effect estimate; the true effect is likely to be substantially different than the estimated effect. In addition, this rating may be used if there is no evidence or it is not possible to estimate an effect.

**Table S5** Excluded articles

| Reference                                                                                                                                                                                                                                                                           | Reason for exclusion                                                                                                                 |
|-------------------------------------------------------------------------------------------------------------------------------------------------------------------------------------------------------------------------------------------------------------------------------------|--------------------------------------------------------------------------------------------------------------------------------------|
| Arazpour M, et al. The physiological cost index of walking with mechanical and powered gait orthosis in patients with spinal cord injury. <i>Spinal Cord</i> 2013;51(5):356–359                                                                                                     | Not a randomized controlled trial                                                                                                    |
| Kressler J, et al. Metabolic responses to 4 different body weight-supported locomotor training approaches in persons with incomplete spinal cord injury. <i>Arch Phys Med Rehabil</i> 2013;94(8):1436–1442                                                                          | Duplicate to Field-Fote et al (2011)                                                                                                 |
| Raithatha R, et al. Non-invasive brain stimulation and robot-assisted gait training after incomplete spinal cord injury: a randomized pilot study. <i>NeuroRehabilitation</i> 2016;38(1):15–25                                                                                      | Robot-assisted gait training present in both treatment groups; trial does not evaluate effectiveness of robot-assisted gait training |
| Swinnen E, et al. Effectiveness of robot-assisted gait training in persons with spinal cord injury: a systematic review. <i>J Rehabil Med</i> 2010;42(6):520–526                                                                                                                    | Not a randomized controlled trial                                                                                                    |
| Varoqui D, et al. Ankle voluntary movement enhancement following robotic-assisted locomotor training in spinal cord injury. <i>J Neuroeng Rehabil</i> 2014;11:46                                                                                                                    | Duplicate to Duffell et al (2015) and Niu et al (2014)                                                                               |
| Wirz M, et al. Effectiveness of automated locomotor training in patients with acute incomplete spinal cord injury: a randomized controlled multicenter trial. <i>BMC Neurol</i> 2011;11:60                                                                                          | Not a randomized controlled trial; only a protocol                                                                                   |
| Wu M, et al. A cable-driven locomotor training system for restoration of gait in human SCI. <i>Gait Posture</i> 2011;33(2):256–260                                                                                                                                                  | Not a randomized controlled trial                                                                                                    |
| Wu M, et al. Robotic resistance treadmill training improves locomotor function in human spinal cord injury: a pilot study. <i>Arch Phys Med Rehabil</i> 2012;93(5):782–789                                                                                                          | Robot-assisted gait training present in both treatment groups; trial does not evaluate effectiveness of robot-assisted gait training |
| Yoshimoto T, et al. Feasibility and efficacy of high-speed gait training with a voluntary driven exoskeleton robot for gait and balance dysfunction in patients with chronic stroke: nonrandomized pilot study with concurrent control. <i>Int J Rehabil Res</i> 2015;38(4):338–343 | Not a randomized controlled trial                                                                                                    |

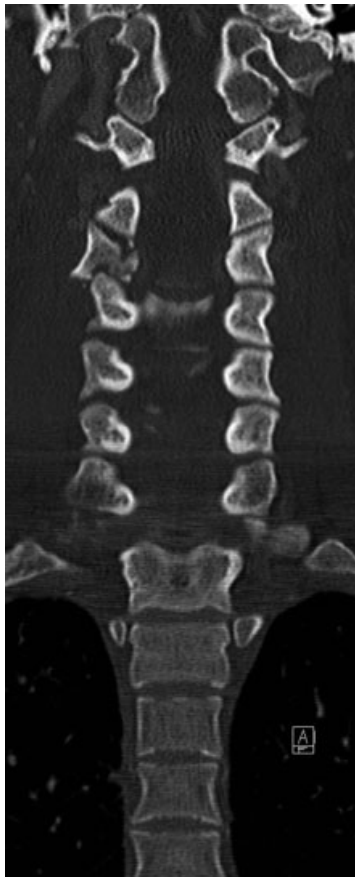

**Fig. S1** Preoperative coronal computed tomography demonstrating C3–C4 fracture.

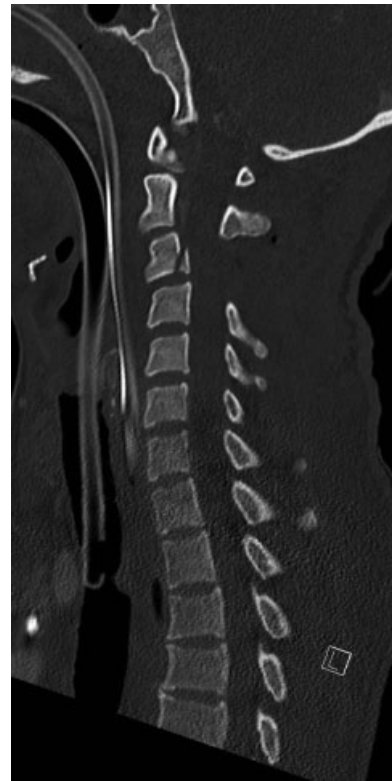

**Fig. S2** Preoperative sagittal computed tomography demonstrating C3–C4 fracture.

ASIA INTERNATIONAL STANDARDS FOR NEUROLOGICAL CLASSIFICATION OF SPINAL CORD INJURY (ISNCSCI) ISCOS

Patient Name: Patient A.G. Date/Time of Exam: 01.04.2016  
 Examiner Name: \_\_\_\_\_ Signature: \_\_\_\_\_

| RIGHT                  |    |    | KEY SENSORY POINTS             |                 | LEFT                           |                 |
|------------------------|----|----|--------------------------------|-----------------|--------------------------------|-----------------|
| MOTOR                  |    |    | Light Touch (LTR)              | Pin Prick (PPR) | Light Touch (LTL)              | Pin Prick (PPL) |
| C2                     | 2  | 2  | 2                              | 2               | 2                              | 2               |
| C3                     | 2  | 2  | 2                              | 2               | 2                              | 2               |
| C4                     | 2  | 2  | 2                              | 2               | 2                              | 2               |
| C5                     | 3  | 2  | 2                              | 2               | 2                              | 2               |
| C6                     | 2  | 2  | 2                              | 2               | 2                              | 2               |
| C7                     | 3  | 2  | 2                              | 2               | 2                              | 2               |
| C8                     | 3  | 2  | 2                              | 2               | 2                              | 2               |
| T1                     | 2  | 2  | 2                              | 2               | 2                              | 2               |
| T2                     | 2  | 2  | 2                              | 2               | 2                              | 2               |
| T3                     | 2  | 2  | 2                              | 2               | 2                              | 2               |
| T4                     | 2  | 2  | 2                              | 2               | 2                              | 2               |
| T5                     | 2  | 2  | 2                              | 2               | 2                              | 2               |
| T6                     | 2  | 2  | 2                              | 2               | 2                              | 2               |
| T7                     | 2  | 2  | 2                              | 2               | 2                              | 2               |
| T8                     | 2  | 2  | 2                              | 2               | 2                              | 2               |
| T9                     | 2  | 2  | 2                              | 2               | 2                              | 2               |
| T10                    | 2  | 2  | 2                              | 2               | 2                              | 2               |
| T11                    | 2  | 2  | 2                              | 2               | 2                              | 2               |
| T12                    | 2  | 2  | 2                              | 2               | 2                              | 2               |
| L1                     | 2  | 2  | 2                              | 2               | 2                              | 2               |
| L2                     | 3  | 2  | 2                              | 2               | 2                              | 2               |
| L3                     | 2  | 2  | 2                              | 2               | 2                              | 2               |
| L4                     | 2  | 2  | 2                              | 2               | 2                              | 2               |
| L5                     | 2  | 2  | 2                              | 2               | 2                              | 2               |
| S1                     | 2  | 2  | 2                              | 2               | 2                              | 2               |
| S2                     | 2  | 2  | 2                              | 2               | 2                              | 2               |
| S3                     | 2  | 2  | 2                              | 2               | 2                              | 2               |
| S4-5                   | 2  | 2  | 2                              | 2               | 2                              | 2               |
| RIGHT TOTALS (MAXIMUM) |    |    | 56                             | 56              | 56                             | 56              |
| MOTOR SUBSCORES        |    |    | SENSORY SUBSCORES              |                 | MOTOR SUBSCORES                |                 |
| UER                    | 13 | 12 | LTR 56 + LTL 56 = LT TOTAL 112 |                 | PPR 56 + PPL 56 = PP TOTAL 112 |                 |
| LER                    | 11 | 11 | MAX (56) (56) (112)            |                 | MAX (56) (56) (112)            |                 |
| UEMS TOTAL 25          |    |    | LEMS TOTAL 22                  |                 | LMS TOTAL 23                   |                 |
| MAX (25) (25)          |    |    | MAX (50) (50)                  |                 | MAX (50) (50)                  |                 |

NEUROLOGICAL LEVELS: 1. SENSORY INT R INT L, 2. MOTOR C5 R C5 L, 3. NEUROLOGICAL LEVEL OF INJURY (NLI) C5, 4. COMPLETE OR INCOMPLETE? IN, 5. ASIA IMPAIRMENT SCALE (AIS) C, 6. ZONE OF PARTIAL PRESERVATION (ZPP) NA R NA L, NA L NA R, MOTOR NA NA, NA NA

Generated by EMSICI (ISNCSCI) calculator <https://this.emsici.org> This form may be copied freely but should not be altered without permission from the American Spinal Injury Association. computationally classified by iISNCSCI V1.0/CGI 13.02 REV 04/15

**Fig. S3** (A, B) Neurologic status according to the American Spinal Injury Association (ASIA) at the time of study enrollment.

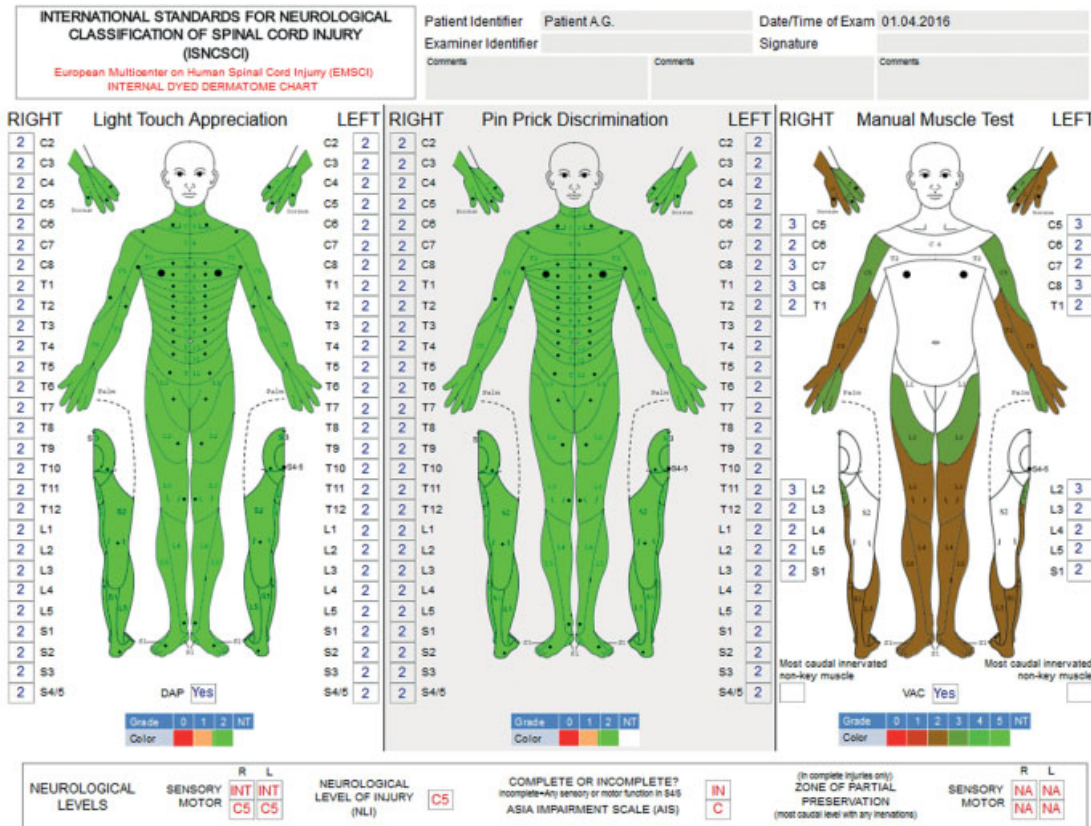

Fig. S3 (Continued)

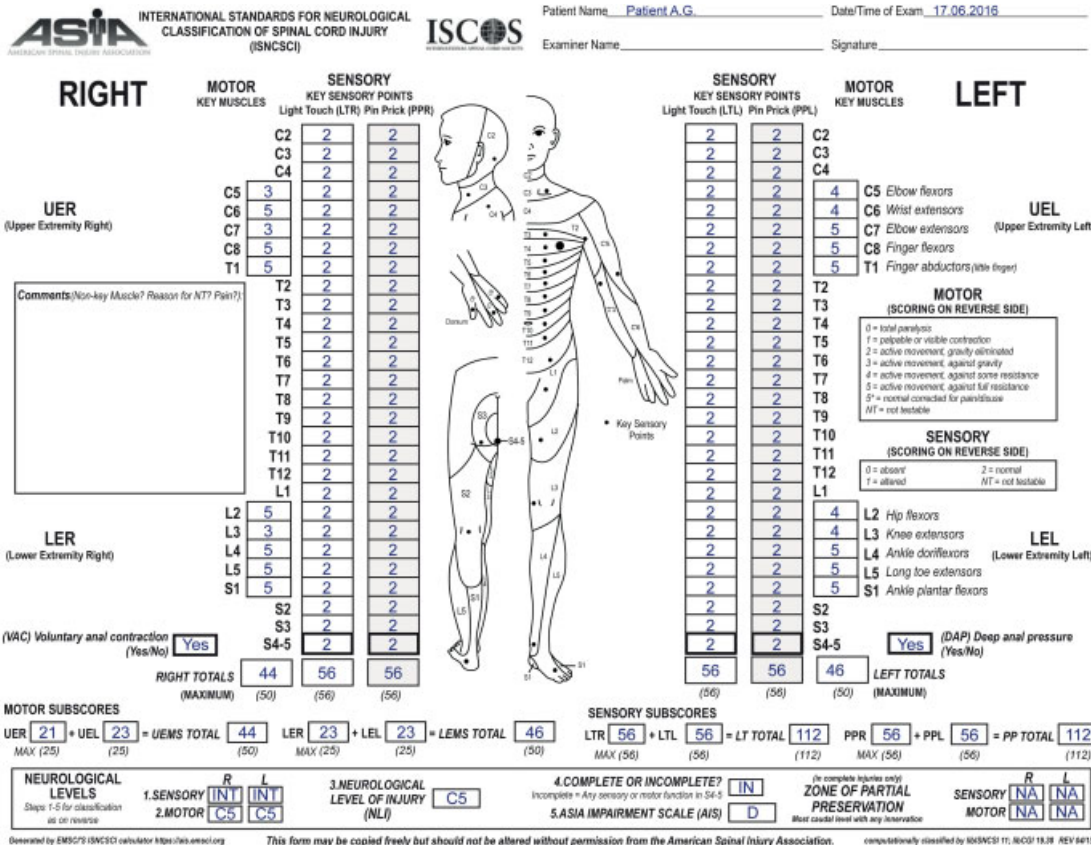

Fig. S4 (A, B) Neurologic status according to the American Spinal Injury Association (ASIA) at the time of admission after 12 weeks of HAL (Hybrid Assistive Limb, Cyberdyne, Tsukuba, Japan) body weight-supported treadmill training.

**INTERNATIONAL STANDARDS FOR NEUROLOGICAL CLASSIFICATION OF SPINAL CORD INJURY (ISNCSCI)**  
 European Multicenter on Human Spinal Cord Injury (EMSCI)  
 INTERNAL DYED DERMATOME CHART

Patient Identifier: Patient A.G. Date/Time of Exam: 17.06.2016  
 Examiner Identifier: Signature: \_\_\_\_\_  
 Comments: \_\_\_\_\_

| RIGHT |      | Light Touch Appreciation |  | LEFT |  | RIGHT |   | Pin Prick Discrimination |  | LEFT |  | RIGHT |      | Manual Muscle Test |  | LEFT |  |
|-------|------|--------------------------|--|------|--|-------|---|--------------------------|--|------|--|-------|------|--------------------|--|------|--|
| 2     | C2   | 2                        |  | 2    |  | 2     | 2 | 2                        |  | 2    |  | 3     | C5   | 4                  |  | 4    |  |
| 2     | C3   | 2                        |  | 2    |  | 2     | 2 | 2                        |  | 2    |  | 5     | C6   | 4                  |  | 4    |  |
| 2     | C4   | 2                        |  | 2    |  | 2     | 2 | 2                        |  | 2    |  | 3     | C7   | 5                  |  | 5    |  |
| 2     | C5   | 2                        |  | 2    |  | 2     | 2 | 2                        |  | 2    |  | 5     | C8   | 5                  |  | 5    |  |
| 2     | C6   | 2                        |  | 2    |  | 2     | 2 | 2                        |  | 2    |  | 5     | T1   | 5                  |  | 5    |  |
| 2     | C7   | 2                        |  | 2    |  | 2     | 2 | 2                        |  | 2    |  |       | T2   |                    |  |      |  |
| 2     | C8   | 2                        |  | 2    |  | 2     | 2 | 2                        |  | 2    |  |       | T3   |                    |  |      |  |
| 2     | T1   | 2                        |  | 2    |  | 2     | 2 | 2                        |  | 2    |  |       | T4   |                    |  |      |  |
| 2     | T2   | 2                        |  | 2    |  | 2     | 2 | 2                        |  | 2    |  |       | T5   |                    |  |      |  |
| 2     | T3   | 2                        |  | 2    |  | 2     | 2 | 2                        |  | 2    |  |       | T6   |                    |  |      |  |
| 2     | T4   | 2                        |  | 2    |  | 2     | 2 | 2                        |  | 2    |  |       | T7   |                    |  |      |  |
| 2     | T5   | 2                        |  | 2    |  | 2     | 2 | 2                        |  | 2    |  |       | T8   |                    |  |      |  |
| 2     | T6   | 2                        |  | 2    |  | 2     | 2 | 2                        |  | 2    |  |       | T9   |                    |  |      |  |
| 2     | T7   | 2                        |  | 2    |  | 2     | 2 | 2                        |  | 2    |  |       | T10  |                    |  |      |  |
| 2     | T8   | 2                        |  | 2    |  | 2     | 2 | 2                        |  | 2    |  |       | T11  |                    |  |      |  |
| 2     | T9   | 2                        |  | 2    |  | 2     | 2 | 2                        |  | 2    |  | 5     | L2   | 4                  |  | 4    |  |
| 2     | T10  | 2                        |  | 2    |  | 2     | 2 | 2                        |  | 2    |  | 3     | L3   | 4                  |  | 4    |  |
| 2     | T11  | 2                        |  | 2    |  | 2     | 2 | 2                        |  | 2    |  | 5     | L4   | 5                  |  | 5    |  |
| 2     | T12  | 2                        |  | 2    |  | 2     | 2 | 2                        |  | 2    |  | 5     | L5   | 5                  |  | 5    |  |
| 2     | L1   | 2                        |  | 2    |  | 2     | 2 | 2                        |  | 2    |  | 5     | S1   | 5                  |  | 5    |  |
| 2     | L2   | 2                        |  | 2    |  | 2     | 2 | 2                        |  | 2    |  |       | L5   |                    |  |      |  |
| 2     | L3   | 2                        |  | 2    |  | 2     | 2 | 2                        |  | 2    |  |       | S2   |                    |  |      |  |
| 2     | L4   | 2                        |  | 2    |  | 2     | 2 | 2                        |  | 2    |  |       | S3   |                    |  |      |  |
| 2     | L5   | 2                        |  | 2    |  | 2     | 2 | 2                        |  | 2    |  |       | S4/5 |                    |  |      |  |
| 2     | S1   | 2                        |  | 2    |  | 2     | 2 | 2                        |  | 2    |  |       |      |                    |  |      |  |
| 2     | S2   | 2                        |  | 2    |  | 2     | 2 | 2                        |  | 2    |  |       |      |                    |  |      |  |
| 2     | S3   | 2                        |  | 2    |  | 2     | 2 | 2                        |  | 2    |  |       |      |                    |  |      |  |
| 2     | S4/5 | 2                        |  | 2    |  | 2     | 2 | 2                        |  | 2    |  |       |      |                    |  |      |  |

DAP: Yes  
 Grade: 0 1 2 NT  
 Color: [Color key]

Pin Prick: Yes  
 Grade: 0 1 2 NT  
 Color: [Color key]

Manual Muscle Test: VAC: Yes  
 Grade: 0 1 2 3 4 5 NT  
 Color: [Color key]

NEUROLOGICAL LEVELS: R L SENSORY MOTOR INT INT C5 C5 NEUROLOGICAL LEVEL OF INJURY (NLI): C5 COMPLETE OR INCOMPLETE? Incomplete=Any sensory or motor function in S4/5 ASIA IMPAIRMENT SCALE (AIS): IN D (In complete injuries only) ZONE OF PARTIAL PRESERVATION (most caudal level with any innervations): R L SENSORY MOTOR NA NA NA NA

Fig. S4 (Continued)

**Video 1**

Walking performance with HAL (Hybrid Assistive Limb, Cyberdyne, Tsukuba, Japan) body weight-supported treadmill training at baseline and after 12 weeks. (Online content including video sequences viewable at: [www.thieme-connect.com/products/ejournals/html/10.1055/s-0036-1593805](http://www.thieme-connect.com/products/ejournals/html/10.1055/s-0036-1593805).)

**Video 2**

Performance for 10-meter walk test at baseline and after 12 weeks. (Online content including video sequences viewable at: [www.thieme-connect.com/products/ejournals/html/10.1055/s-0036-1593805](http://www.thieme-connect.com/products/ejournals/html/10.1055/s-0036-1593805).)

**Video 3**

Walking performance on stairs after 12 weeks. (Online content including video sequences viewable at: [www.thieme-connect.com/products/ejournals/html/10.1055/s-0036-1593805](http://www.thieme-connect.com/products/ejournals/html/10.1055/s-0036-1593805).)

**References**

- 1 Rehabilitation Measures Database. Rehab measures: 10 meter walk test. 2014. Available at: <http://www.rehabmeasures.org/Lists/RehabMeasures/DispForm.aspx?ID=901>. Accessed June 6, 2016
- 2 Rehabilitation Measures Database. Rehab measures: 6 minute walk test. 2013. Available at: <http://www.rehabmeasures.org/Lists/RehabMeasures/DispForm.aspx?ID=895>. Accessed June 6, 2016
- 3 Rehabilitation Measures Database. Rehab measures: walking index for spinal cord injury. 2013. Available at: <http://www.rehabmeasures.org/Lists/RehabMeasures/DispForm.aspx?ID=957>. Accessed June 6, 2016
- 4 Rehabilitation Measures Database. Rehab measures: spinal cord independence measure. 2013. Available at: <http://www.rehabmeasures.org/Lists/RehabMeasures/PrintView.aspx?ID=967>. Accessed June 6, 2016
- 5 Atkins D, Best D, Briss PA, et al; GRADE Working Group. Grading quality of evidence and strength of recommendations. *BMJ* 2004; 328(7454):1490
- 6 Balshem H, Helfand M, Schünemann HJ, et al. GRADE guidelines: 3. Rating the quality of evidence. *J Clin Epidemiol* 2011;64(4): 401-406
